# Supplementary material
Source: HighWire-hosted journal article supplement (https://bmjopen.bmj.com/content/8/1/e019630)
Supplement: inline-supplementary-material-1 [file inline-supplementary-material-1.pdf]

Welcome to the OOPR Survey

**Dear Participant,**

**You have previously taken time Out of Programme to undertake a period of Research (OOPR). We are interested in why you did this and the outcome or benefits you feel this may have had in relation to your career, research skills and clinical practice.**

**We would greatly appreciate your completion of this questionnaire to help us understand what motivates trainees to undertake a period of OOPR, and what you feel are the perceived and actual benefits of this for your future career.**

**Some of the questions ask about your personal view of various aspects of your experience, and we recognise that for some people these may be sensitive questions. Please be reassured that any information you provide in this questionnaire will only be seen by the research team, and will never be shared with anyone else in a way that could enable them to identify you.**

**Completion time for the questionnaire is approximately 15 minutes.**

**Many thanks for your participation.**

**Professor Lorraine Harper  
Associate Dean for Academic Programmes at Health Education West Midlands  
Head of Clinical Academic Training, University of Birmingham**

In completing this questionnaire, you agree to the following:

1. I understand the research aims
2. The research process has been fully explained and I understand what my participation will involve
3. I understand that my participation is voluntary and that I am free to withdraw at any time, without giving reason
4. I agree to the use of [anonymised quotes/aggregated results] in publications
5. I understand and agree to how my responses will be used and stored
6. I agree to take part in the study

Background Information

1. Your Name

\* 2. What is your gender?

Female

Male

3. What is your Age?

4. What was your year of graduation?

\* 5. What is your current specialty area?

\* 6. What motivated you to undertake OOPR? Choose all that apply.

To improve NHS career prospects

Wanted an academic career

Wanted to develop new skills

Other (please specify)

\* 7. Stage of training when OOPR

ST1-2

ST3-4

ST5-6

\* 8. Length of OOPR undertaken

1 year

2 years

3 years

Other (please specify)

\* 9. Who funded your OOPR? Tick more than one option if split funded

Wellcome Trust

CRUK

MRC

Other Charity

Self-funded

Employer

Other (please specify)

OOP Research Experience

\* 10. Which clinical discipline was your OOPR experience based in?

\* 11. What area was your research in?

Other (please specify)

\* 12. Did you complete your research?

Yes

No

13. Please tell us more about the reason why you 'did not' complete your research



\* 14. How satisfied were you with the outcome of your research?

|                       |                       |                                      |                       |                       |
|-----------------------|-----------------------|--------------------------------------|-----------------------|-----------------------|
| Very satisfied        | Satisfied             | Neither satisfied or<br>dissatisfied | Dissatisfied          | Very dissatisfied     |
| <input type="radio"/> | <input type="radio"/> | <input type="radio"/>                | <input type="radio"/> | <input type="radio"/> |

If you were dissatisfied, how could this have been improved?

\* 15. How satisfied were you that you completed your research as planned?

|                       |                       |                                      |                       |                       |
|-----------------------|-----------------------|--------------------------------------|-----------------------|-----------------------|
| Very satisfied        | Satisfied             | Neither satisfied or<br>dissatisfied | Dissatisfied          | Very dissatisfied     |
| <input type="radio"/> | <input type="radio"/> | <input type="radio"/>                | <input type="radio"/> | <input type="radio"/> |

If you were dissatisfied, how could this have been improved?

\* 16. How satisfied were you with the advice and support from the following:

|                                 | Very satisfied        | Satisfied             | Neither satisfied or<br>dissatisfied | Dissatisfied          | Very dissatisfied     |
|---------------------------------|-----------------------|-----------------------|--------------------------------------|-----------------------|-----------------------|
| Your Supervisor                 | <input type="radio"/> | <input type="radio"/> | <input type="radio"/>                | <input type="radio"/> | <input type="radio"/> |
| Specialty Training<br>Committee | <input type="radio"/> | <input type="radio"/> | <input type="radio"/>                | <input type="radio"/> | <input type="radio"/> |

Please add any additional information you wish to provide regarding the advice and support you received.

\* 17. Did you feel isolated from your clinical peers whilst undertaking OOPR?

| To a very large extent | To a large extent     | Somewhat              | To a small extent     | To a very small extent |
|------------------------|-----------------------|-----------------------|-----------------------|------------------------|
| <input type="radio"/>  | <input type="radio"/> | <input type="radio"/> | <input type="radio"/> | <input type="radio"/>  |

Please add any additional information you wish to provide here.

\* 18. Did you ever feel contradictory demands were placed on you? ie. were you asked to give up your protected research time?

Always

Often

Sometimes

Rarely

Never

Please add any additional information you wish to provide here.

\* 19. Did you continue with some clinical work during your OOPR?

Yes

No

\* 20. If you undertook clinical work during your OOPR, was it

On-call

Clinics

If clinics, please state frequency

\* 21. Did continuing with clinical work during your OOPR assist with your return to clinical practice?

To a very large extent

To a large extent

Somewhat

To a small extent

To a very small extent

Progress Following OOPR

\* 22. What degree was awarded?

Other (please specify)

Progress Following OOPR

\* 23. If a degree was not awarded, why?

- Did not submit thesis
- Did not register for degree
- Not associated with a University
- Did not pass at Viva

Other (please specify)

\* 24. Have you reached CCT?

Yes

No

\* 25. What post do you hold currently?

Academic Post

Clinical Post



26. Academic Post - Choose One

Other (please specify)

27. Clinical Post - Choose one

Other (please specify)

\* 28. What are your current long term career plans?

- Clinical post - no teaching or research
- Clinical post - some teaching responsibility
- Clinical post - some research time
- Clinical post - some teaching and research
- Clinical academic post
- Undecided

Other (please specify)

\* 29. How influential has your OOPR experience been in informing your long term career plans?

Extremely influential      Very influential      Moderately influential      Slightly influential      Not at all influential

30. In what way did your OOPR experience influence your long term career plans?

\* 31. Have you participated in research since completing your OOPR?

Yes

No

\* 32. Which best describes your continued research participation?

- As a Clinical Lecturer
- Within further training
- Grant funded
- Within PAs as a Consultant

Other (please specify)

\* 33. How much of your time do you currently spend engaging in research activity?

- Up to 25%
- 25 - 50%
- Over 50%

\* 34. To what extent did undertaking research as part of your OOPR improve the quality of the clinical care you provide?

Significantly improved

Moderately improved

No impact on clinical care

\* 35. What aspects of your clinical care were improved? Choose all that apply.

- Understanding of evidence-based medicine
- Improved critical assessment of complex problems
- Improved team working
- Improved time management
- Improved communication skills
- Improved trainee supervision

Other (please specify)

\* 36. How many publication have you achieved?

1 - 2

3 - 4

5 +

\* 37. Did you struggle when you returned to clinical work?

Yes

No



\* 38. In which of the following areas do you feel you struggled? Choose all that apply.

- Reduction of clinical skills
- Lack of clinical supervision
- Reintegration to clinical team/environment

Other (please specify)

\* 39. How satisfied were you with the support you received upon return to clinical work, with a return to work package?

|                       |                       |                                      |                       |                       |
|-----------------------|-----------------------|--------------------------------------|-----------------------|-----------------------|
| Very satisfied        | Satisfied             | Neither satisfied or<br>dissatisfied | Dissatisfied          | Very dissatisfied     |
| <input type="radio"/> | <input type="radio"/> | <input type="radio"/>                | <input type="radio"/> | <input type="radio"/> |

If you were dissatisfied with the support you received, how could this have been improved?

\* 40. How would you rate the quality of support you received upon your return to clinical work?

|                       |                       |                       |                       |                       |
|-----------------------|-----------------------|-----------------------|-----------------------|-----------------------|
| Poor                  | Fair                  | Good                  | Very good             | Excellent             |
| <input type="radio"/> |

How could the quality of support have been improved?

\* 41. Would you recommend an Out of Programme to undertake Research to other doctors?

Yes  
 No

Please provide any additional information you wish to provide regarding your answer.

42. Please provide any additional information in relation to your OOPR experience you wish to add. (this information will be treated in the strictest confidence)

Thank you for taking the time to complete this questionnaire.  
If you have any questions relating to this questionnaire please contact Charlotte Maybury at [c.maybury@bham.ac.uk](mailto:c.maybury@bham.ac.uk)
